# Supplementary material
Source: publisher figshare collection journal article supplement (https://frontiersin.figshare.com/ndownloader/files/25470089)
Supplement: Supplementary file 1 [file 25470089]

**
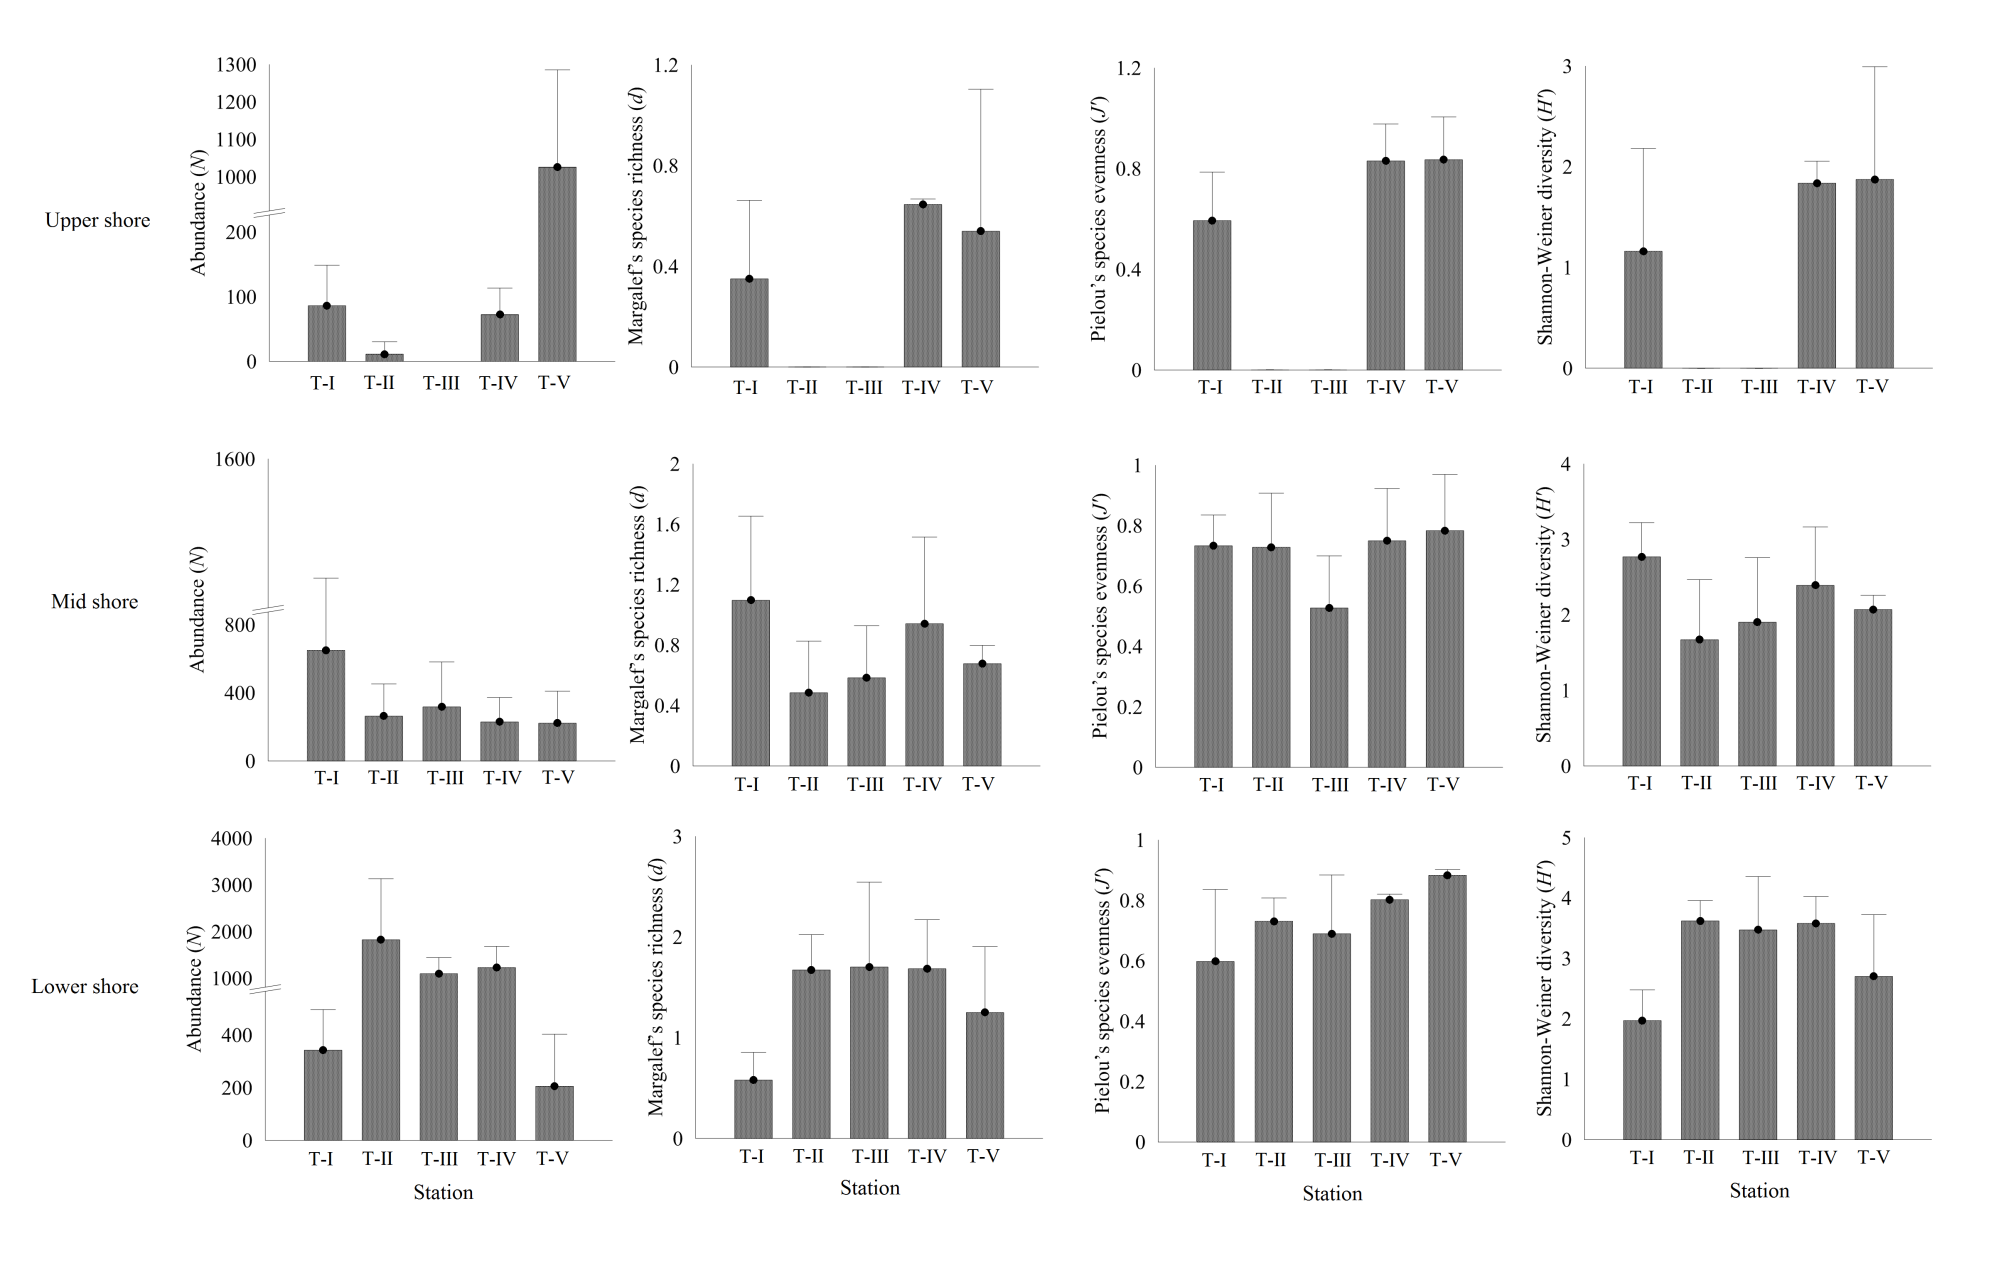
Supplementary 4.** Variations observed in amphipod diversity indices (avg ± SD) at each shore level across the different transects.
